# Supplementary material for: SETD7-mediated monomethylation is enriched on soluble Tau in Alzheimer’s disease
Source: PubMed Central journal article supplement (PMC8254302; doi:10.1186/s13024-021-00468-x), 2021-07-02

2N4R recombinant tau  
 me2N4R in vitro methylated recombinant tau  
 meK130 CQARMVSK(me)SKDGTG-NH2  
 meK132 CRMVSKSK(me)DGTGSD-NH2  
 meK343 CVEVKSEK(me)LDFKDR-NH2  
 meK353 CKDRVQSK(me)IGSLDN-NH2  
 meK438 CDEVSASLAK(me)QGL-NH2  
 K130/K132 CQARMVSKSKDGTGSD-NH2  
 K343 CVEVKSEKLDFKDR-NH2  
 K353 CKDRVQSKIGDLDN-NH2  
 K438 CDEVSASLAKQGL-NH2

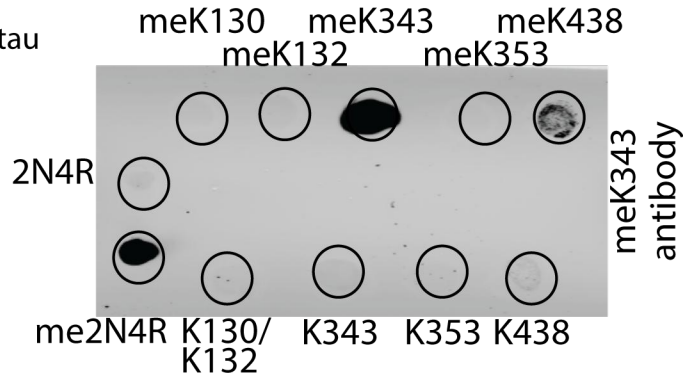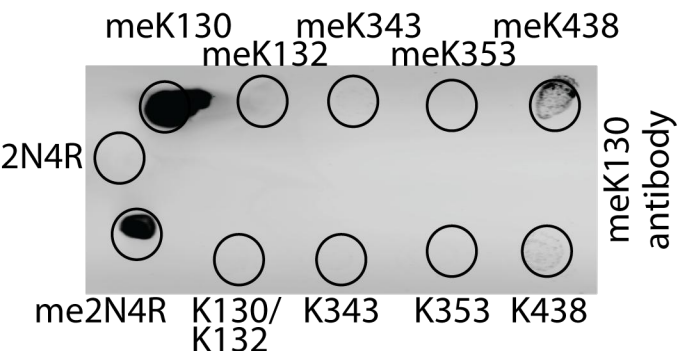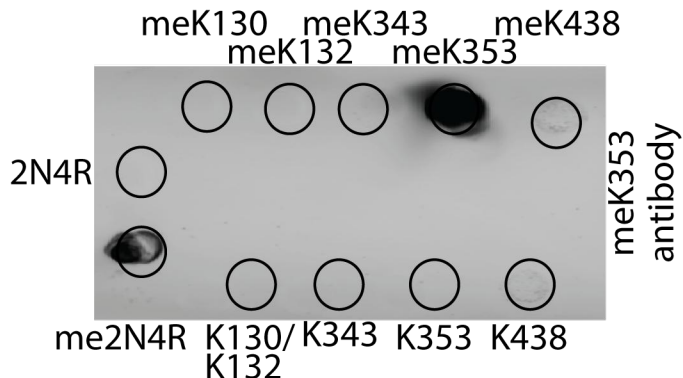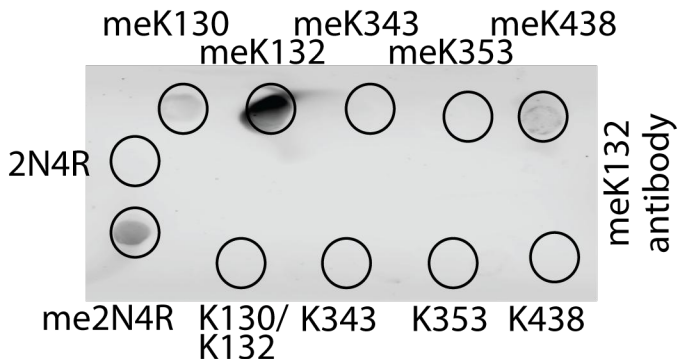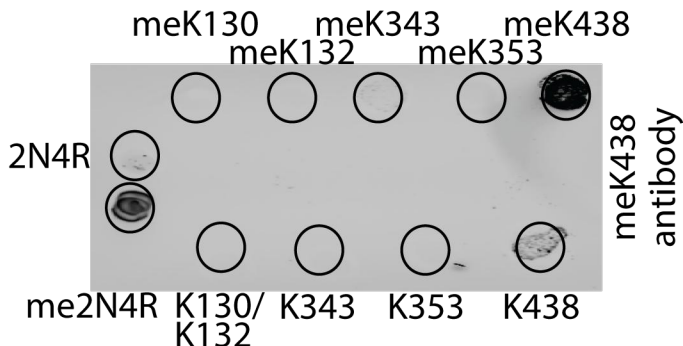

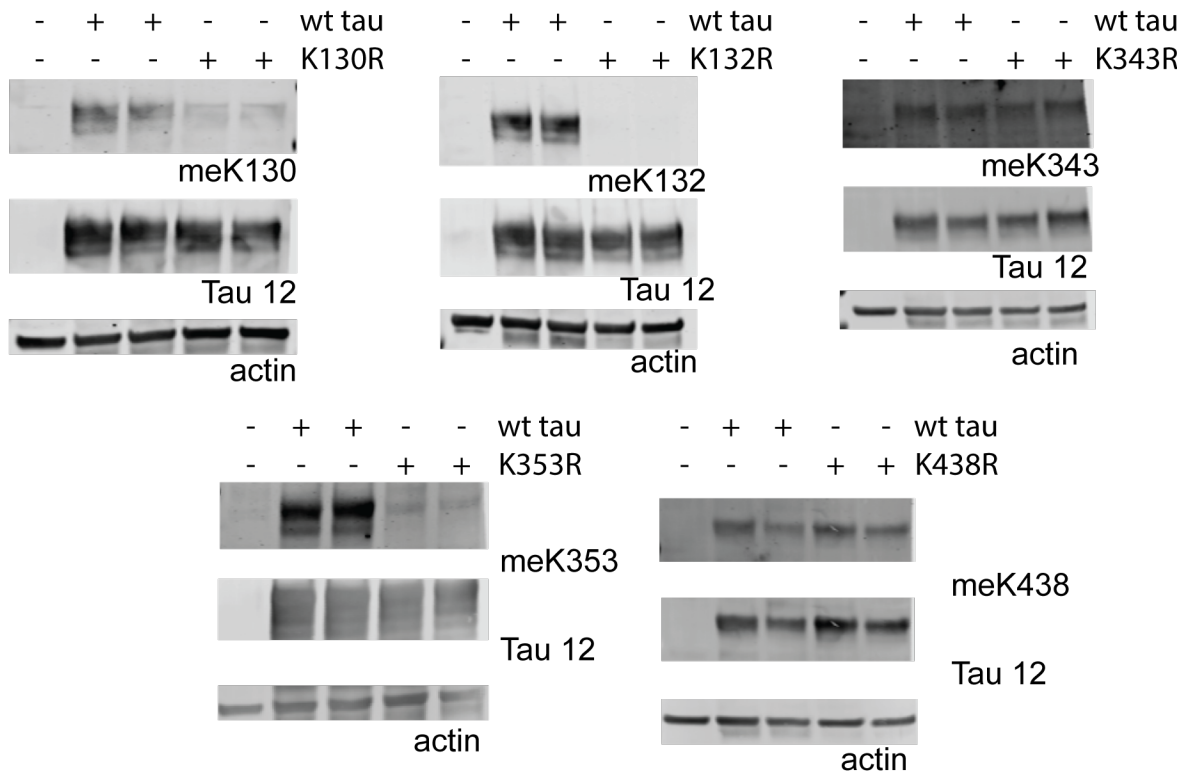

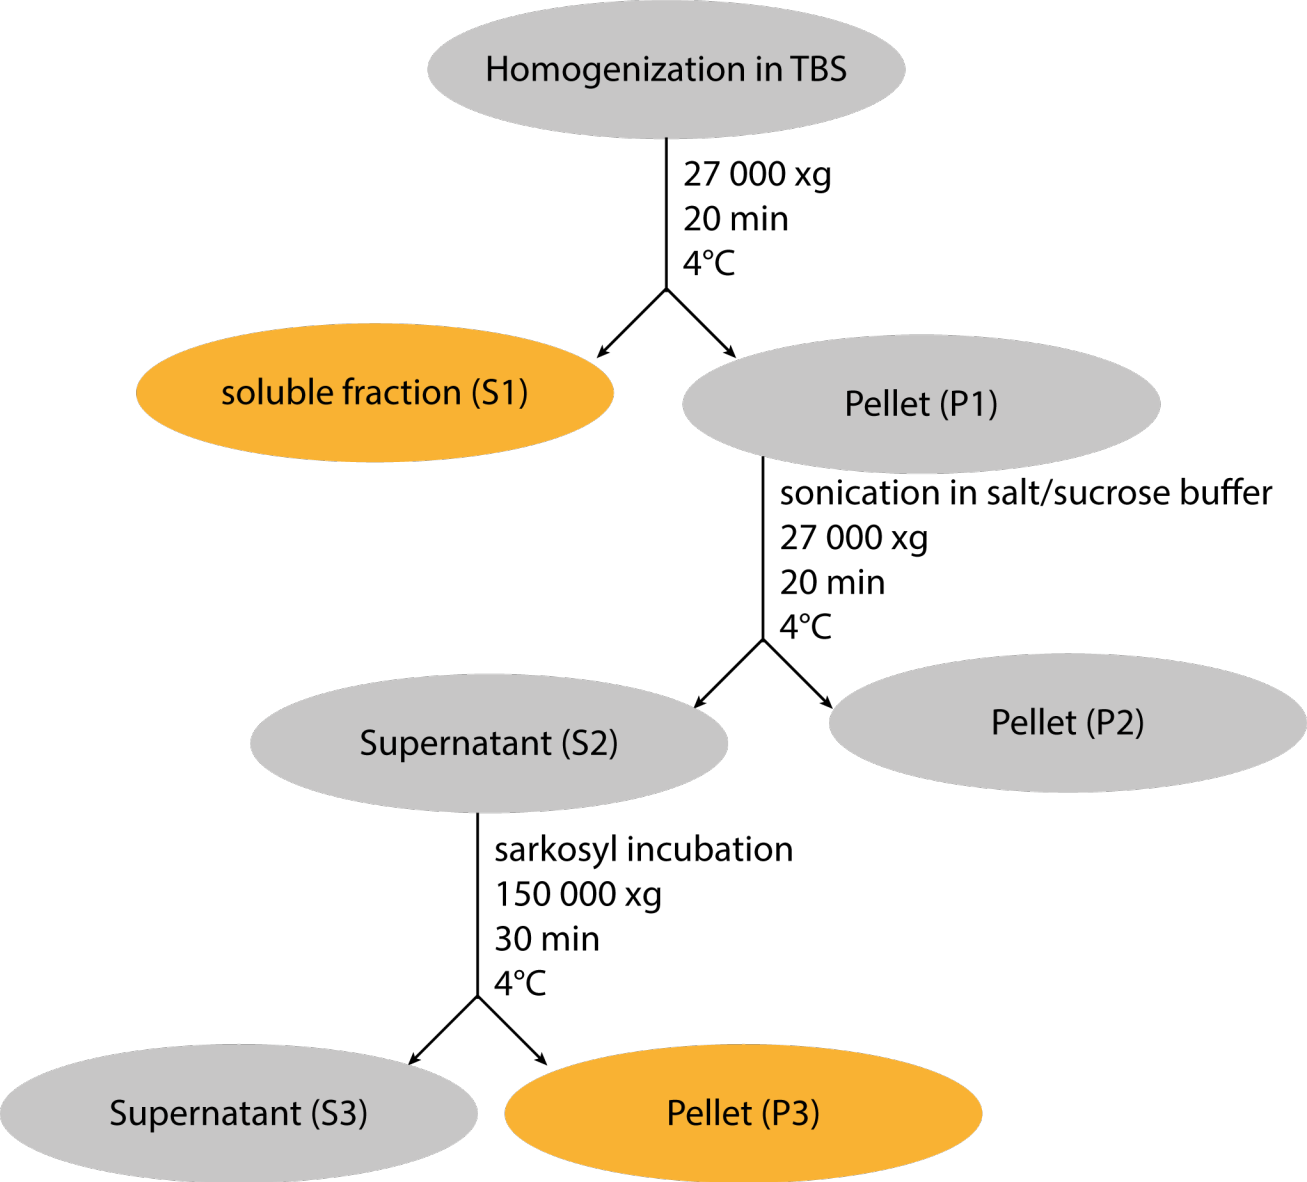

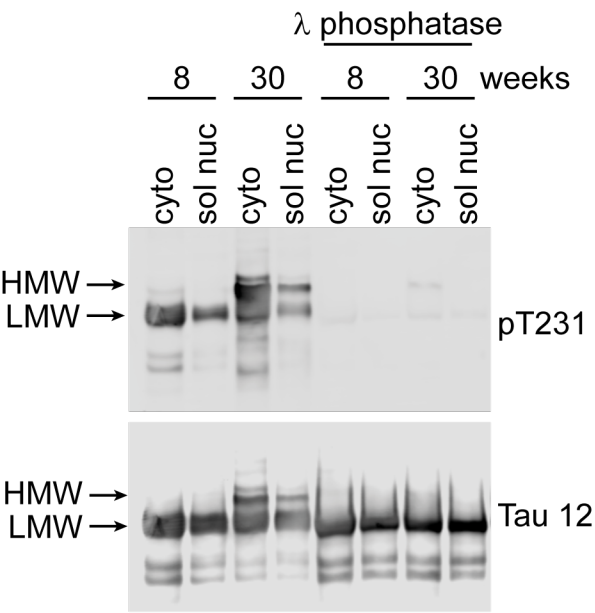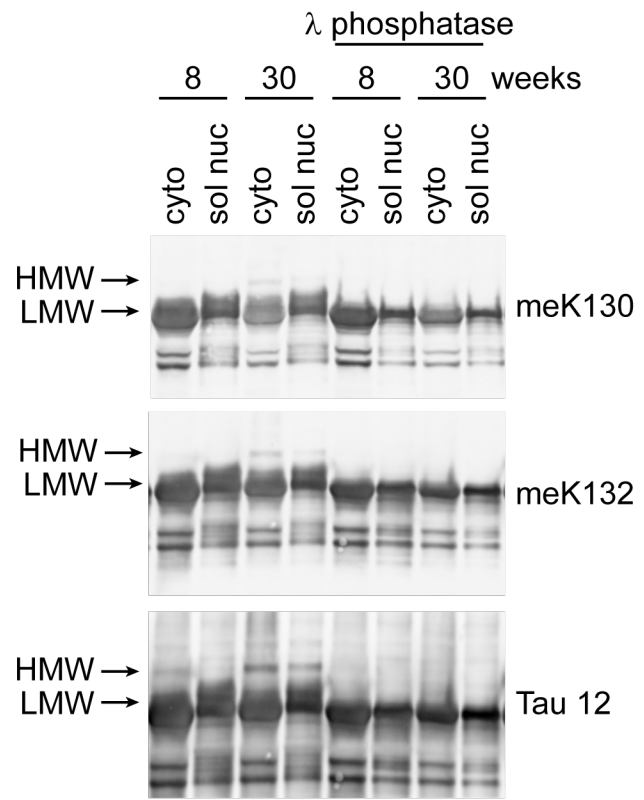

Suppl Figure S4

## Localization of Protein Lysine Methyltransferases

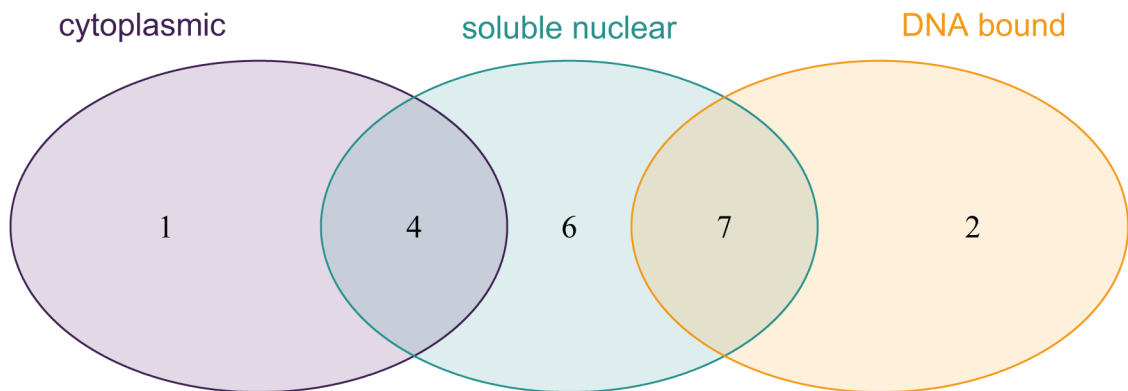



**A**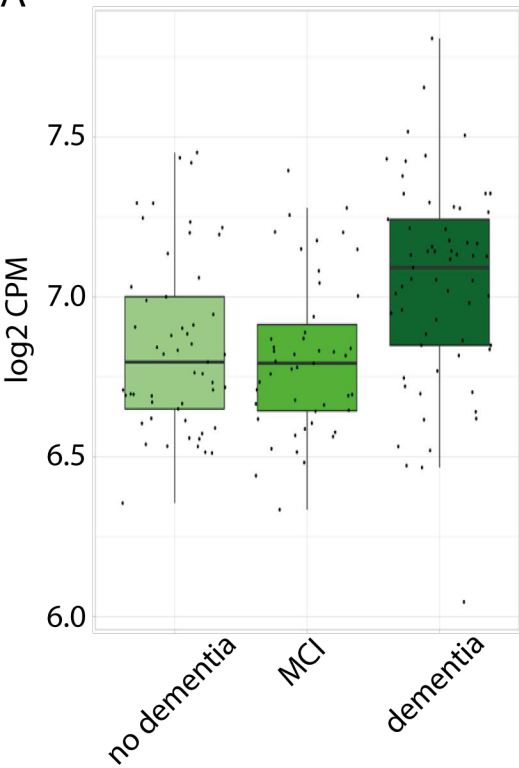**B**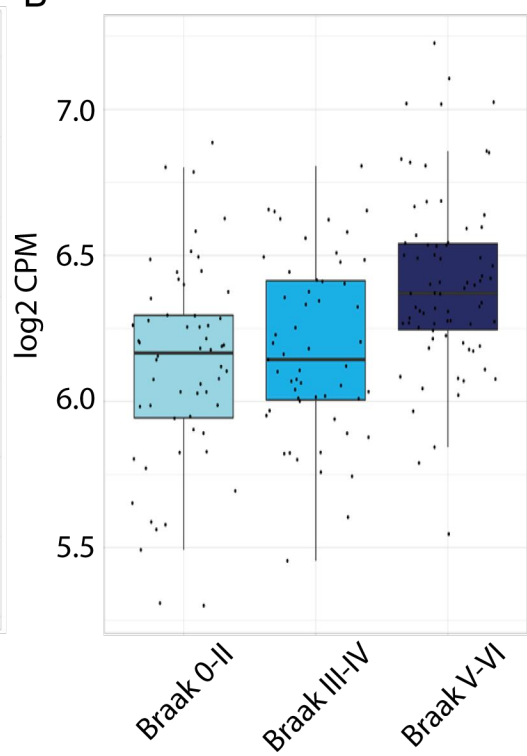**C**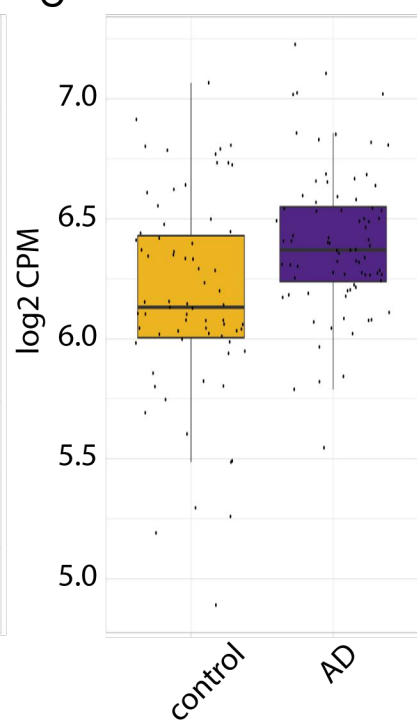

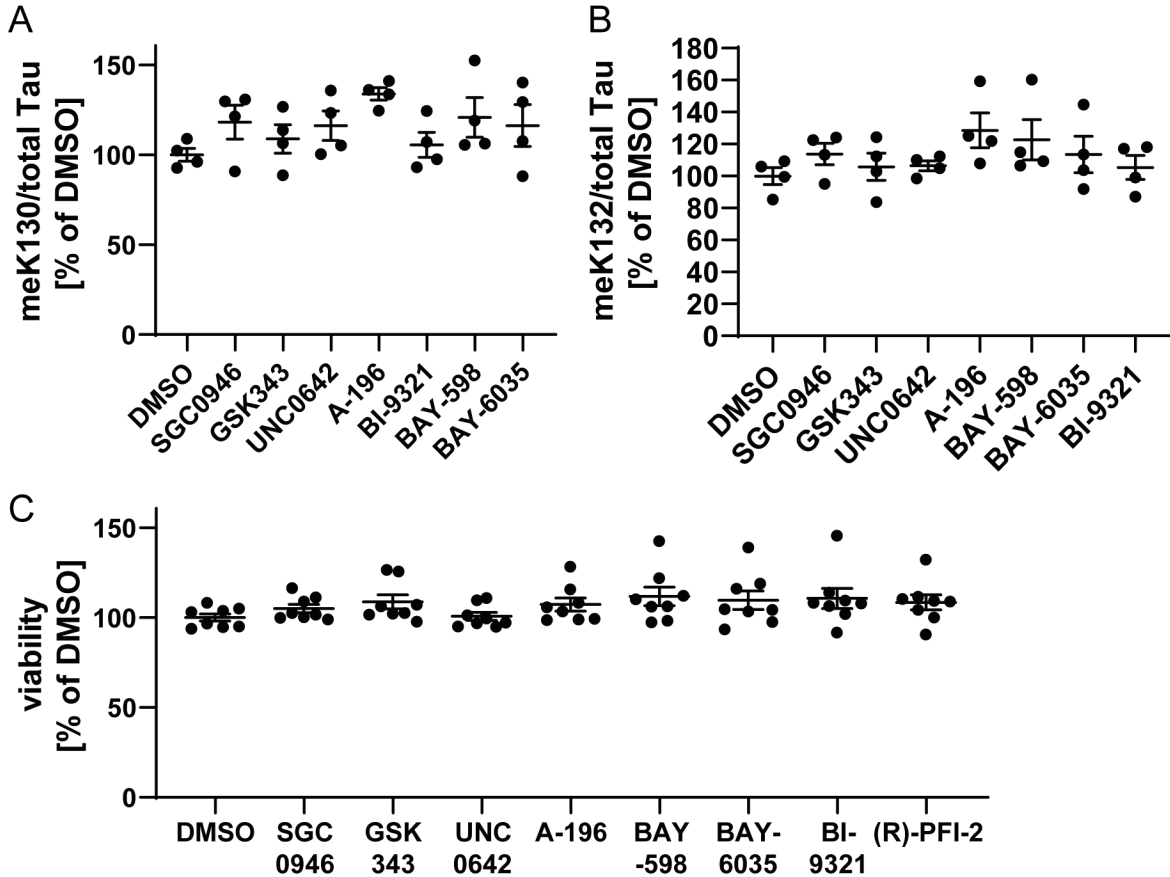



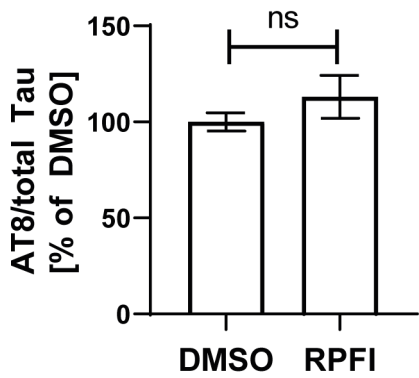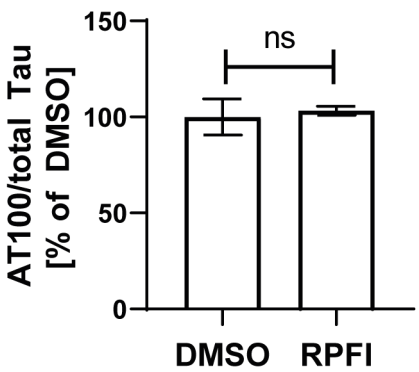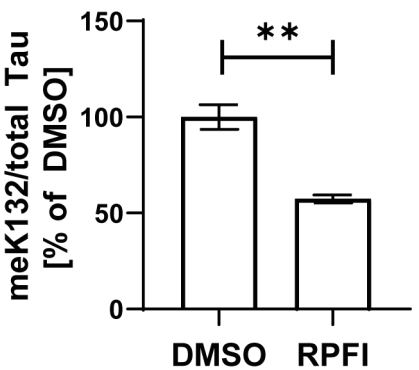

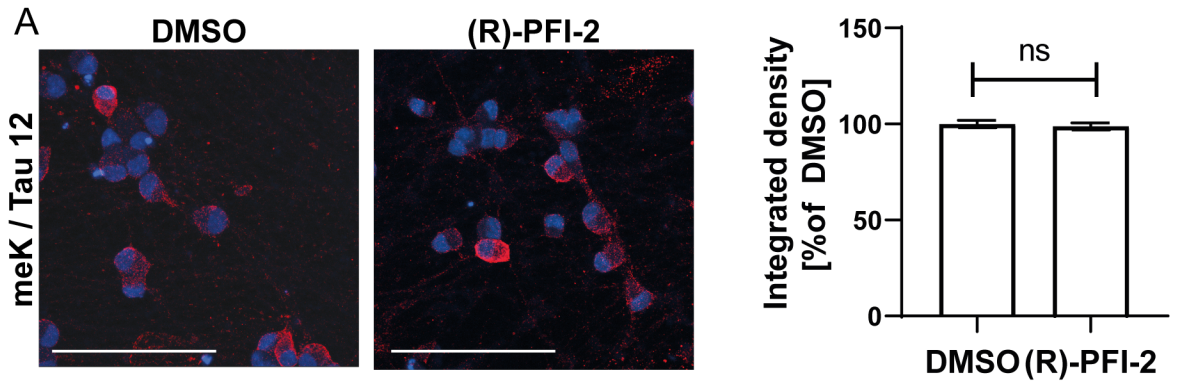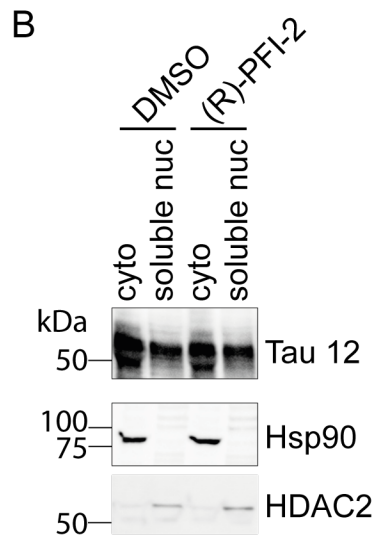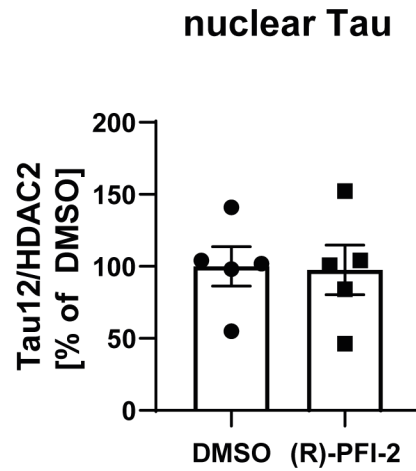

A

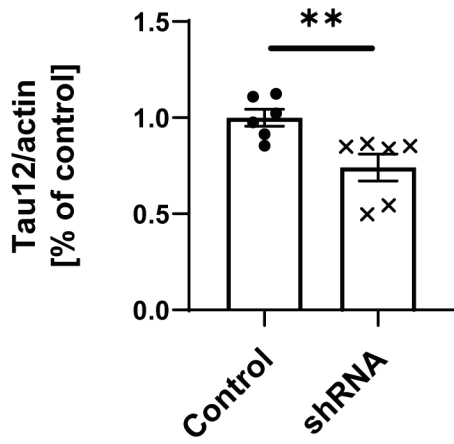

B

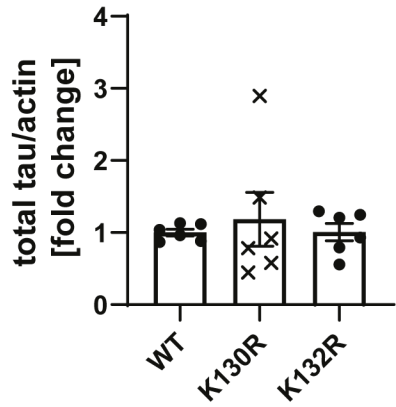

Supplement: 13024_2021_468_MOESM1_ESM.pdf [file 13024_2021_468_MOESM1_ESM.pdf]
