# Supplementary material for: SETD7-mediated monomethylation is enriched on soluble Tau in Alzheimer’s disease
Source: PubMed Central journal article supplement (PMC8254302; doi:10.1186/s13024-021-00468-x), 2021-07-02
Supplement: 13024_2021_468_MOESM2_ESM.pdf [file 13024_2021_468_MOESM2_ESM.pdf]

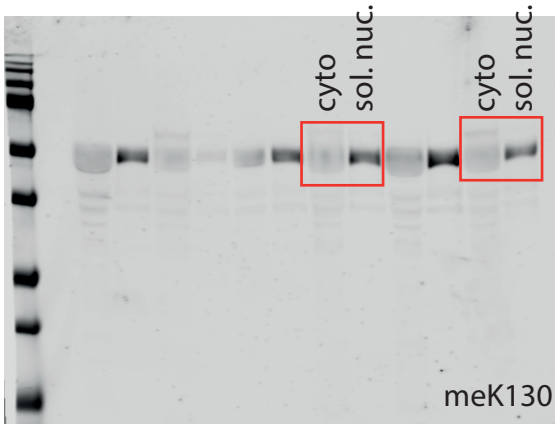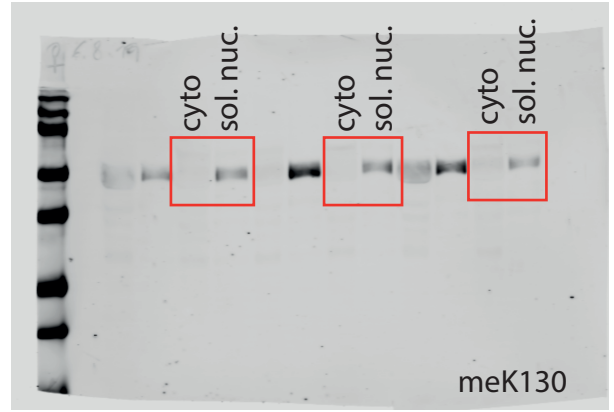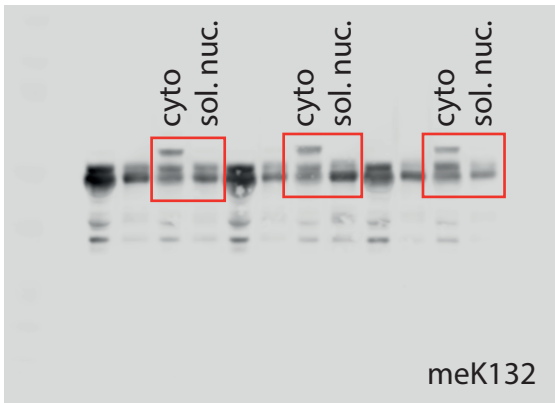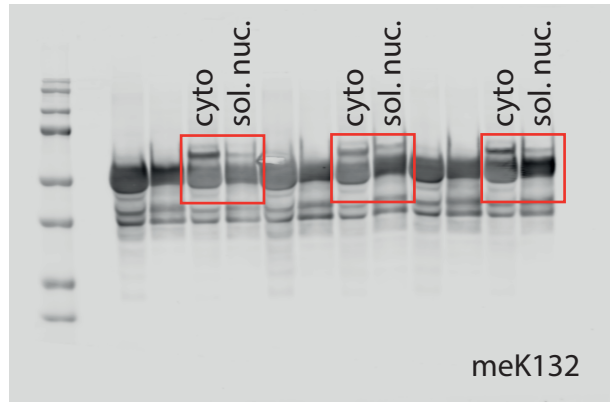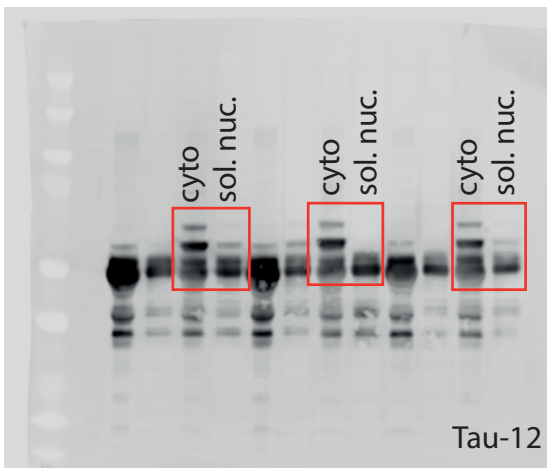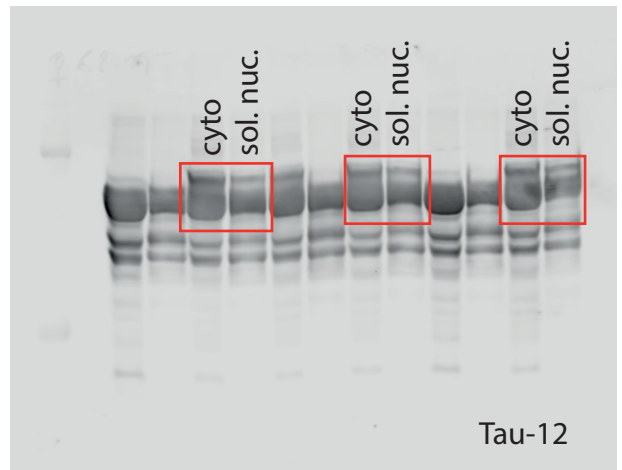

Full Western blot images related to Fig. 3B

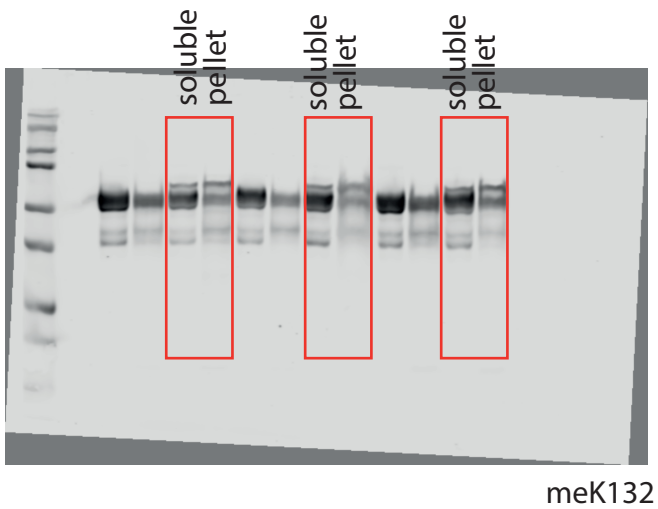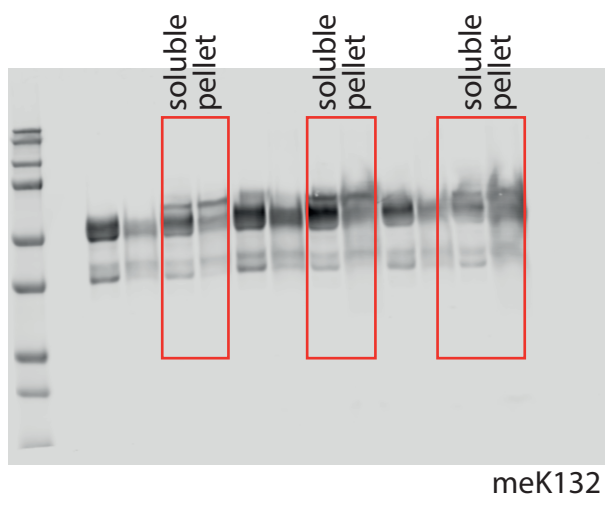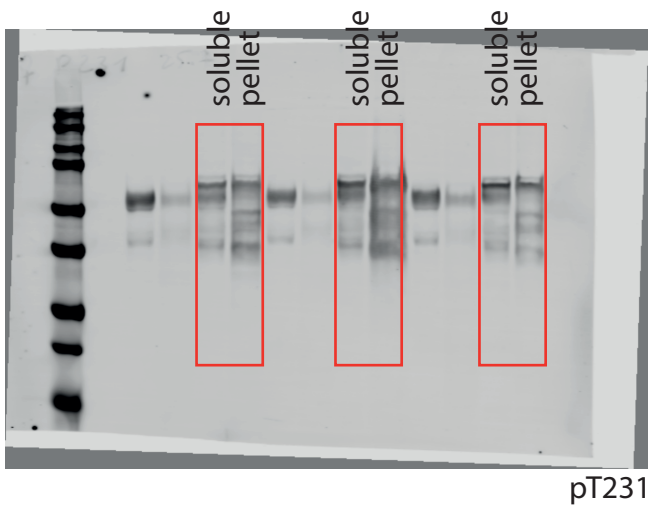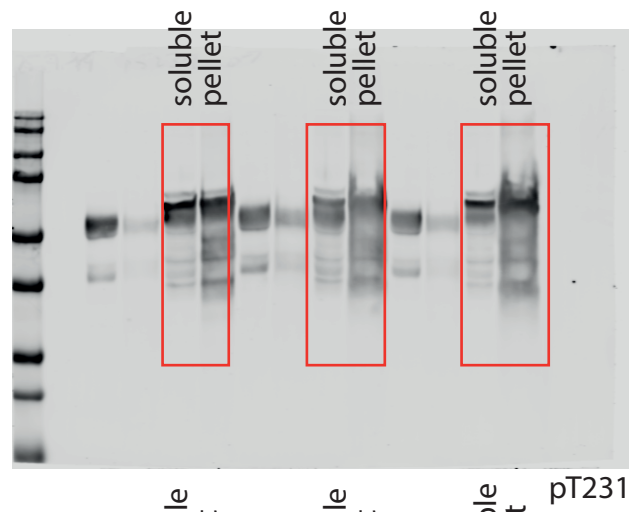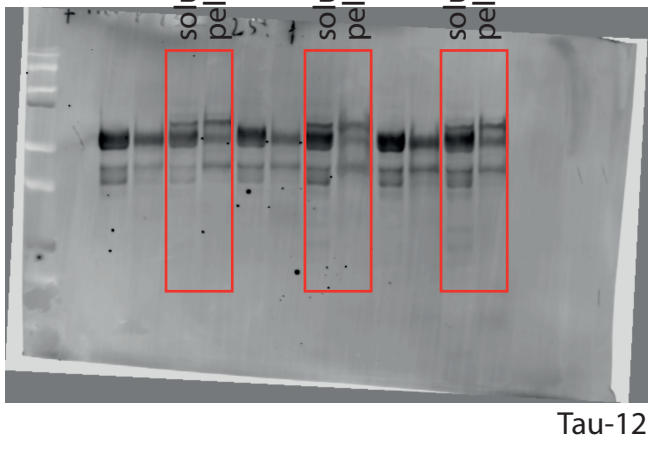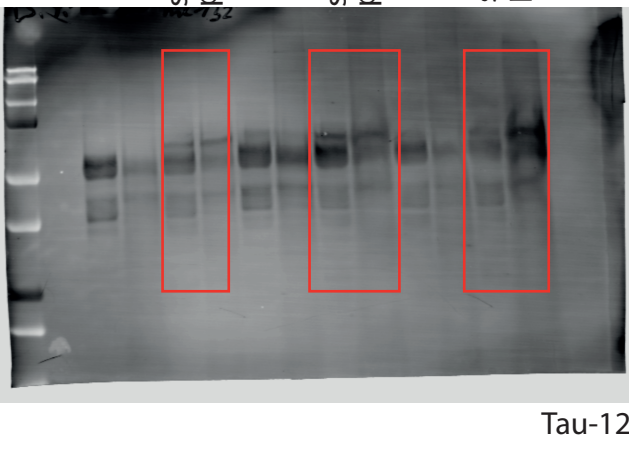

Full Western blot images related to Fig. 3C

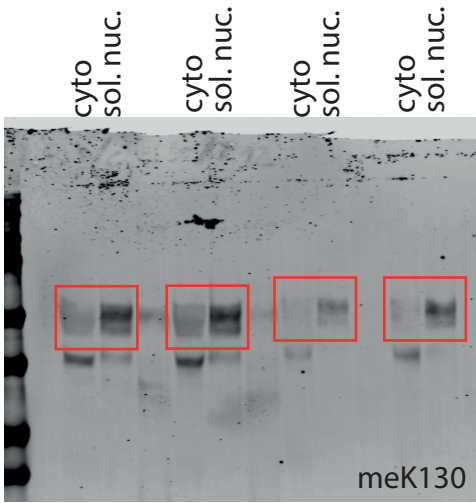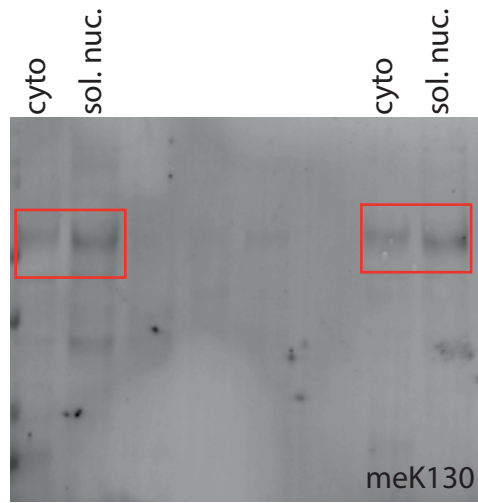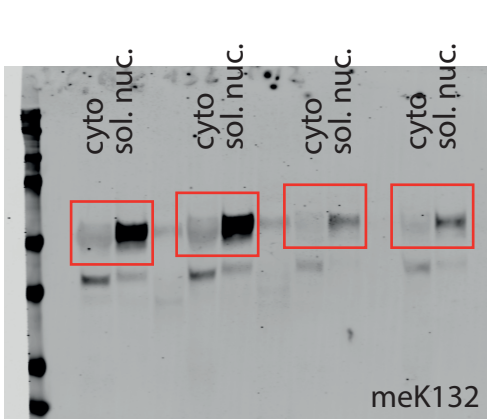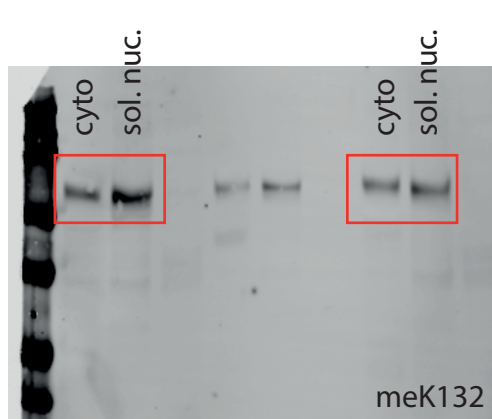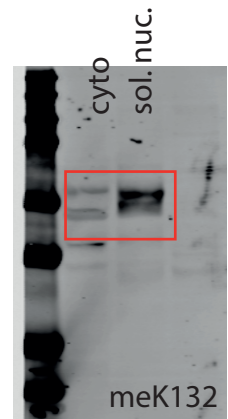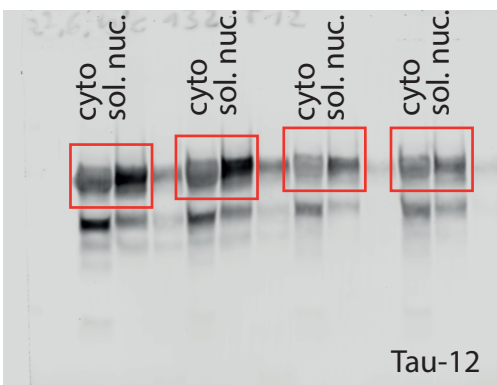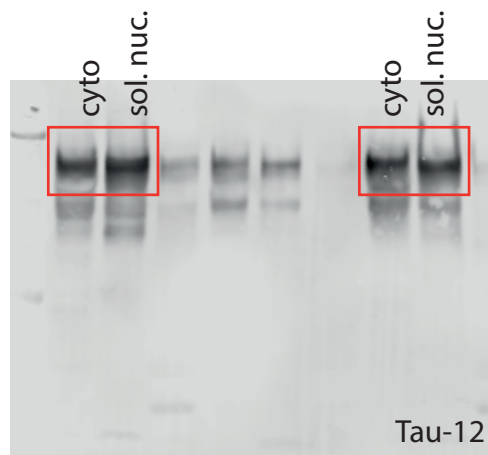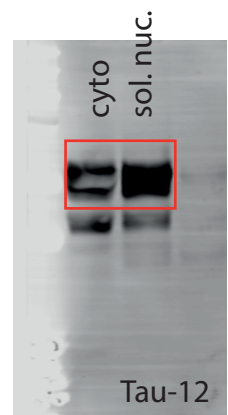

Full Western blot images related to Fig. 4B

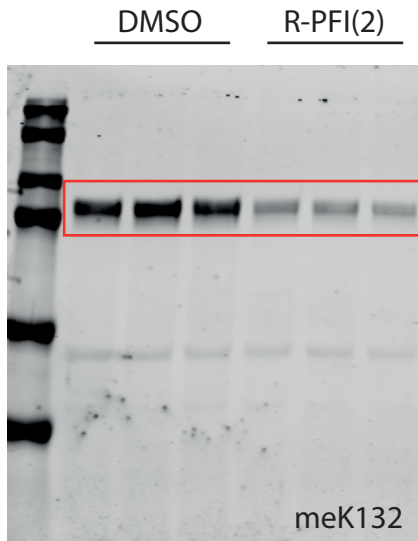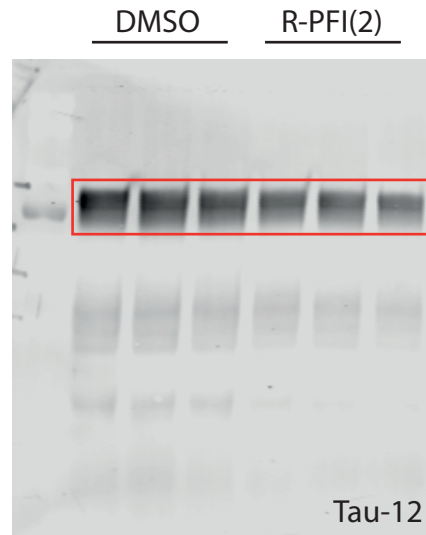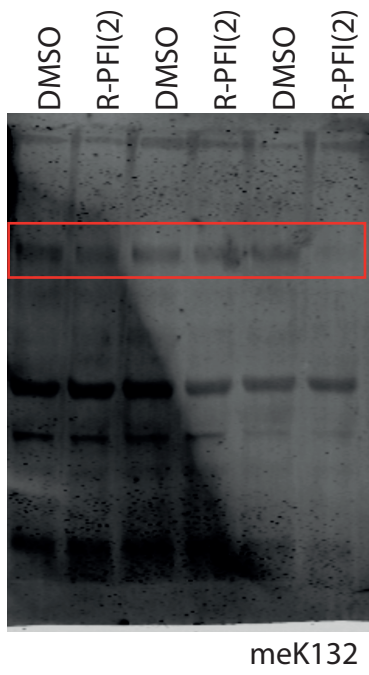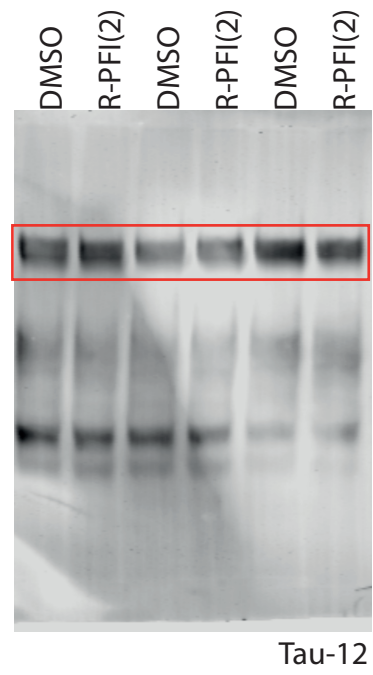

Full Western blot images related to Fig. 5A

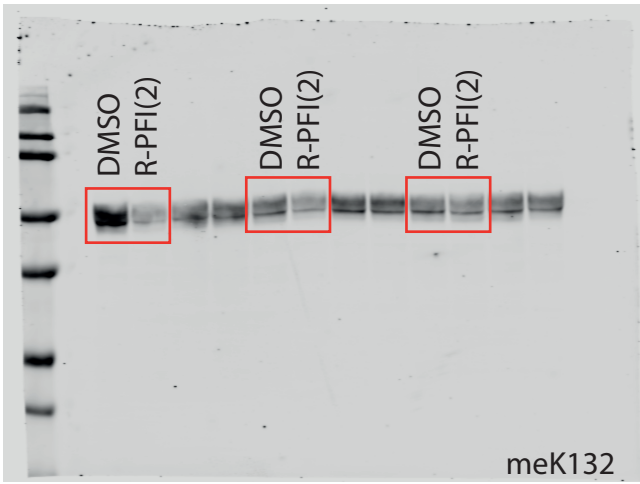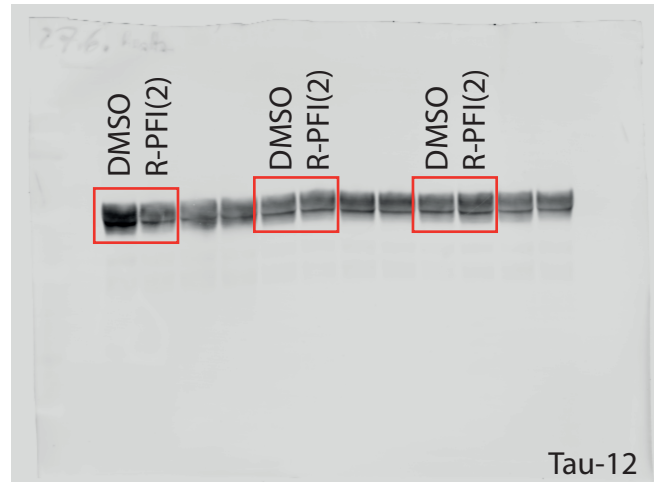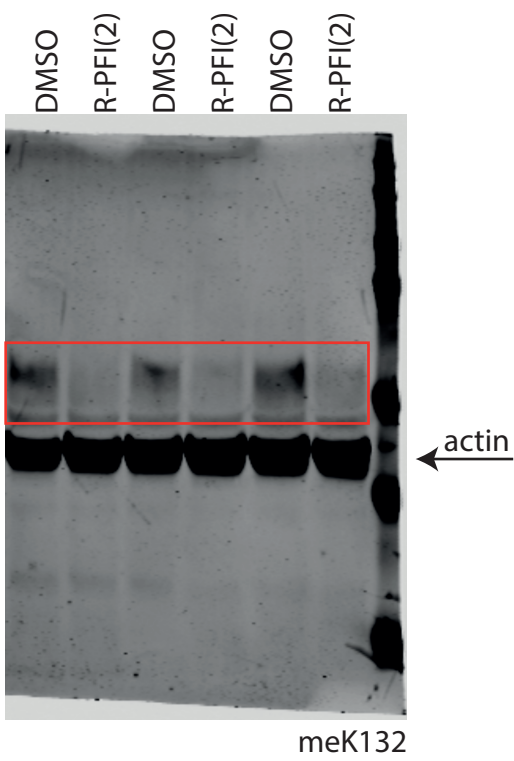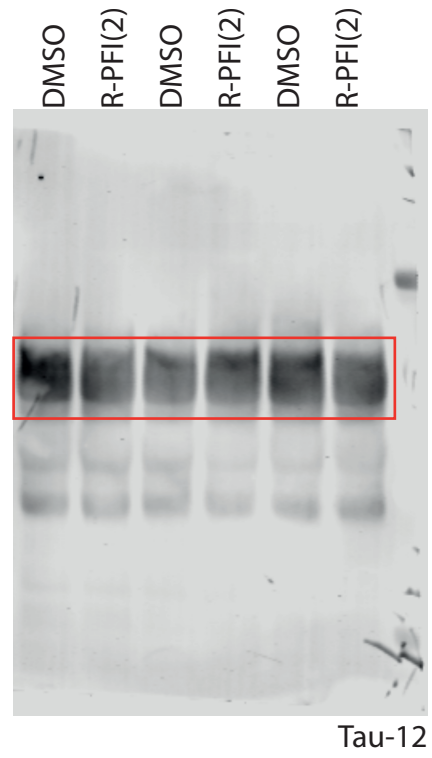

Full Western blot images related to Fig. 5B

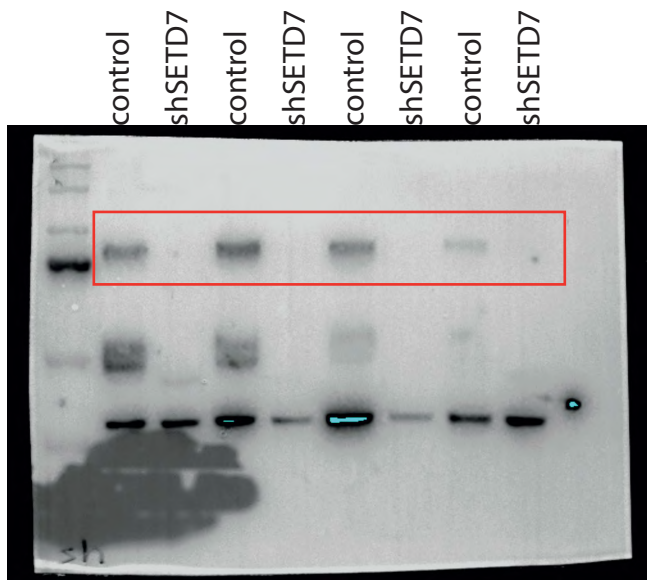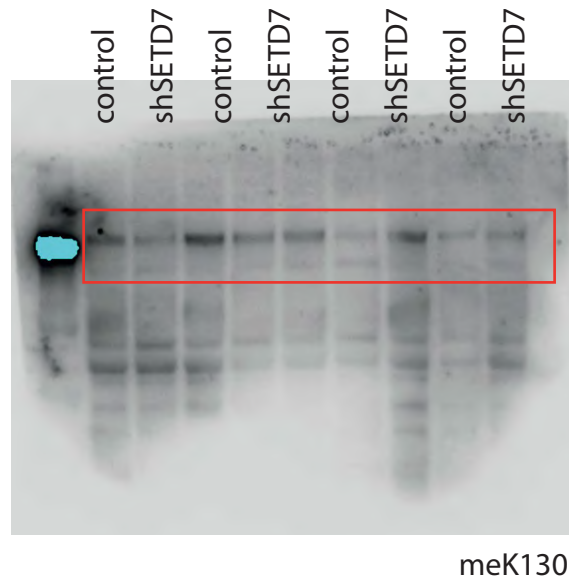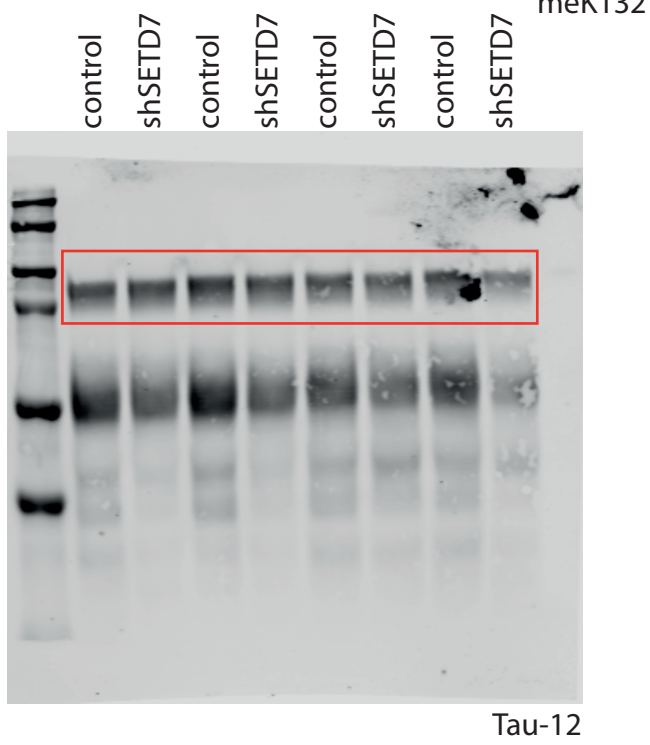

Full Western blot images related to Fig. 6B+C

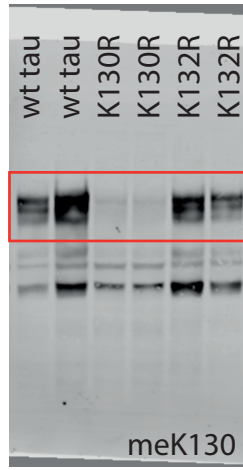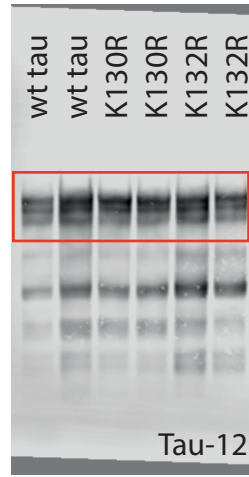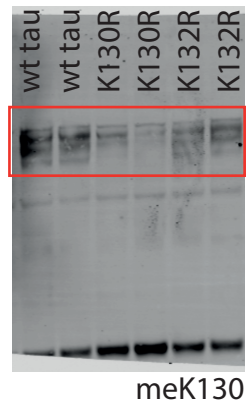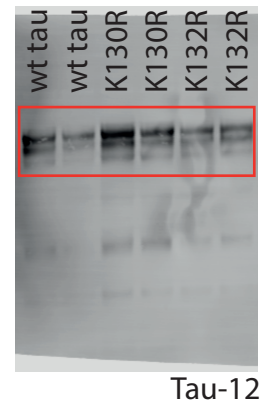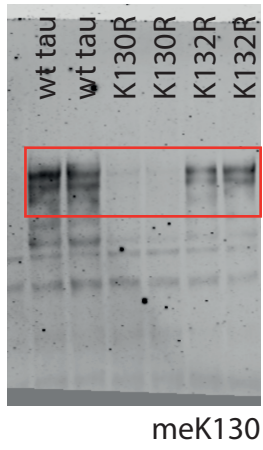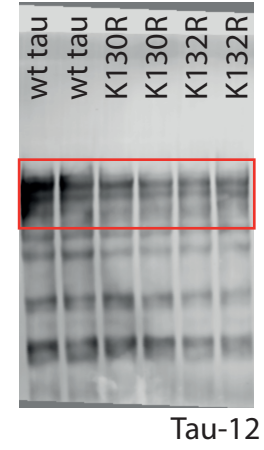

Full Western blot images related to Fig. 6D
